# Supplementary material for: Biological age for chronic kidney disease patients using index model
Source: PeerJ. 2022 Aug 1;10:e13694. doi: 10.7717/peerj.13694 (PMC9351620; doi:10.7717/peerj.13694)
Supplement: Supplemental Information 1 [file peerj-10-13694-s001.xlsx]

## Sheet: Training 
NO	AGE	Gender	CTCA Calcium Score	Creatinine	Weight (kg)	Height (m)	BMI	eGFR	BPSystolic	BPDiastolic	CKD Stage
1	64	Female	156.8	226	52	1.45	24.7325	18.2493	152	85	4
2	60	Male	33.8	254	62	1.59	24.5243	23.9755	139	73	4
3	48	Male	0	206	82	1.71	28.0428	44.9629	125	80	3
4	65	Female	8.7	231	61	1.54	25.721	20.6689	126	67	4
5	67	Female	40.6	279	94	1.54	39.6357	25.6676	136	64	4
6	63	Male	981	636	73	1.64	27.1416	10.8512	168	98	5
7	60	Male	3.4	484	73	1.52	31.5963	14.8145	156	91	5
8	59	Male	178.5	190	85	1.6	33.2031	44.4908	170	76	3
9	70	Male	359.3	299	88	1.58	35.2508	25.2947	136	72	4
10	66	Male	469.8	208	80	1.67	28.6851	34.9444	140	80	3
11	61	Male	306.2	157	81	1.67	29.0437	50.0417	126	77	3
12	82	Female	266.9	149	55	1.5	24.4444	22.3431	147	76	4
13	57	Male	235.2	377	47	1.68	16.6525	12.7044	118	64	5
14	48	Male	0	165	117	1.77	37.3456	80.0958	157	80	2
15	67	Female	0	209	59	1.53	25.204	21.5064	116	49	4
16	43	Male	1372.3	302	89	1.82	26.8687	35.0974	196	98	3
17	81	Male	1263	517	82	1.59	32.4354	11.4893	150	66	5
18	55	Male	6.7	227	68	1.73	22.7204	31.2624	131	81	3
19	63	Male	642.8	176	95	1.61	36.6498	51.0295	168	86	3
20	63	Female	29.1	190	71	1.52	30.7306	30.0285	118	62	3
21	68	Female	1222.7	196	75	1.56	30.8185	28.7526	164	101	4
22	60	Male	23.7	345	82	1.68	29.0533	23.3456	159	79	4
23	67	Male	134.7	219	67	1.6	26.1719	27.4204	150	94	4
24	58	Female	353.1	507	84	1.57	34.0785	14.1783	116	58	5
25	58	Female	81.8	203	71	1.53	30.3302	29.9306	139	74	4
26	56	Male	412.6	330	73	1.65	26.8136	22.8143	126	70	4
27	43	Male	693	335	66	1.61	25.462	23.4634	155	97	4
28	62	Male	1804.1	153	79	1.65	29.0174	49.4481	175	65	4
29	75	Male	1527.5	160	71	1.83	21.201	35.4137	152	66	3
30	55	Female	501	229	73	1.49	32.8814	28.2778	154	74	4
31	62	Male	96.9	210	56	1.54	23.6128	25.5378	137	76	4
32	63	Female	26.6	204	68	1.55	28.3039	26.786	154	74	4
33	72	Female	103.2	170	68	1.54	28.6726	28.3862	153	72	4
34	76	Male	1346.4	173	62	1.65	22.7732	28.1608	135	78	4
35	43	Male	97.2	322	78	1.76	25.1808	28.849	118	70	4
36	59	Female	426.3	171	84	1.58	33.6485	41.5247	120	75	3
37	72	Male	3153.4	181	72	1.61	27.7767	33.211	150	84	3
38	64	Female	34.5	193	54	1.43	26.4072	22.1916	130	74	4
39	72	Male	719.4	205	73	1.6	28.5156	29.7302	128	58	4
40	46	Female	133.7	202	75	1.61	28.9341	36.4231	135	72	3
41	75	Female	274.8	179	62	1.53	26.4855	23.4958	156	89	4
42	69	Male	1.9	212	76	1.69	26.6097	31.2504	225	99	3
43	66	Female	142.4	289	59	1.56	24.2439	15.7661	137	59	4
44	68	Male	117.8	97	81	1.69	28.3604	73.8186	148	85	2
45	64	Female	126.7	158	60	1.47	27.7662	30.1194	144	87	3
46	55	Female	413.6	220	68	1.51	29.8233	27.4185	167	65	4
47	63	Male	5	397	96	1.62	36.5798	22.8608	123	64	4
48	63	Male	0	119	59	1.65	21.6713	46.8722	168	85	3
49	69	Male	1312.6	385	87	1.61	33.5635	19.6987	139	86	4
50	69	Male	236.2	170	85	1.65	31.22	43.5861	139	74	3
51	76	Male	0	232	63	1.7	21.7993	21.3379	156	74	4
52	68	Female	8.1	314	68	1.64	25.2826	16.2724	158	70	4
53	65	Male	0.3	213	75	1.67	26.8923	32.4237	161	86	3
54	65	Male	368.5	175	79	1.66	28.67	41.569	133	67	3
55	59	Male	378.2	161	63	1.61	24.3046	38.9152	122	70	3
56	69	Male	3218	278	80	1.66	29.03	25.0855	132	41	4
57	76	Male	1431.6	192	79	1.61	30.4772	32.3315	137	51	3
58	69	Female	79.5	286	70	1.5	31.1111	18.1355	170	78	4
59	63	Female	98.1	342	59	1.54	24.8777	13.8629	129	75	5
60	48	Female	0	117	68	1.47	31.4684	55.802	183	117	3
61	59	Male	539	676	82	1.7	28.3737	12.0635	142	66	5
62	53	Male	25.1	126	99	1.63	37.2615	83.9274	137	86	2
63	56	Male	3.2	128	111	1.64	41.2701	89.4359	147	99	2
64	65	Male	234.4	117	84	1.74	27.74	66.1111	100	70	2
65	69	Male	1120.3	254	80	1.64	29.7442	27.4558	136	71	4
66	58	Male	9.2	134	67	1.54	28.251	50.3389	119	72	3
67	57	Male	37.4	136	63	1.53	26.9127	47.2063	113	79	3
68	70	Male	999.5	222	101	1.74	33.3598	39.1009	135	77	3
69	56	Female	2349.8	215	99	1.46	46.444	40.3659	121	63	3
70	64	Female	905.7	400	67	1.56	27.5312	13.2852	175	75	5
71	65	Male	3397.3	185	78	1.61	30.0914	38.8243	171	94	3
72	37	Male	15.1	201	84	1.62	32.0073	52.8494	154	97	3
73	53	Male	16.5	161	90	1.67	32.2708	59.7112	145	91	3
74	81	Male	307.7	154	99	1.85	28.9262	46.5679	147	64	3
75	36	Female	6.4	167	107	1.63	40.2725	69.5407	158	72	2
76	73	Male	752.8	233	62	1.62	23.6244	21.8892	118	51	4
77	68	Male	14.5	233	100	1.71	34.1986	37.9399	133	75	3
78	70	Female	485.7	202	53	1.41	26.6586	19.1673	131	57	4
79	74	Male	1.1	194	73	1.68	25.8645	30.4919	138	79	3
80	48	Male	537.5	543	81	1.7	28.0277	16.8497	176	89	4
81	64	Male	1249.3	181	91	1.65	33.4252	46.9133	136	78	3
82	61	Male	12.6	345	81	1.6	31.6406	22.7726	187	78	4
83	37	Female	0	370	69	1.67	24.7409	20.0458	186	111	4
84	65	Female	56.7	201	64	1.49	28.83	24.9221	142	76	4
85	78	Female	587.4	114	63	1.51	27.63	35.7574	145	87	3
86	77	Female	1607.8	158	56	1.46	26.27	23.3029	141	62	4
87	69	Male	1555.3	249	76	1.62	28.96	26.6068	127	76	4
88	58	Male	182.9	140	81	1.7	28.03	58.2493	148	75	3
89	63	Female	11.1	155	70	1.47	32.39	36.2907	138	65	3
90	63	Male	637.4	219	90	1.69	31.51	38.8516	139	77	3
91	70	Male	1082.4	182	75	1.72	25.35	35.4167	131	69	3
92	74	Female	166.8	301	70	1.56	28.76	16.0182	152	62	4
93	53	Female	0	282	51	1.44	24.59	16.4202	109	63	4
94	67	Female	0	227	79	1.55	32.88	26.5132	148	74	4
95	71	Female	384.6	132	56	1.43	27.39	30.5493	127	60	3
96	53	Female	167.6	594	70	1.49	31.53	10.6996	196	86	5
97	52	Male	387.3	192	83	1.67	29.76	46.7067	122	85	3
98	60	Male	431.2	207	66	1.56	26.44	31.3172	144	72	3
99	73	Male	259.7	125	72	1.62	27.43	47.3824	140	71	3
100	61	Male	182.4	754	93	1.72	31.44	11.9635	153	84	5
101	66	Female	0.5	135	81	1.61	31.2488	46.3363	126	69	3
102	71	Male	869.4	161	55	1.66	19.96	28.9405	170	72	4
103	78	Male	12.9	139	59	1.58	23.63	32.3109	117	64	3
104	64	Female	167.4	270	62	1.61	23.92	18.2129	144	89	4
105	50	Male	108.3	248	76	1.75	24.82	33.8629	178	97	3
106	68	Male	28.3	217	76	1.55	31.63	30.9604	154	53	3
107	53	Female	306.1	140	67	1.5	29.78	43.4515	158	98	3
108	75	Male	127.4	151	75	1.59	29.67	39.6385	139	70	3
109	63	Male	731.2	182	91	1.66	33.02	47.2694	156	57	3
110	58	Male	30.6	389	60	1.61	23.15	15.5287	179	77	4
111	82	Male	2158.1	242	74	1.57	30.02	21.7753	156	59	4
112	68	Male	55	175	84	1.67	30.12	42.432	166	79	3
113	67	Female	142.1	122	65	1.49	29.28	40.5896	135	65	3
114	61	Male	1463.6	598	60	1.69	21.01	9.73188	136	58	5
115	51	Female	0	222	68	1.52	29.43	28.4502	165	92	4
116	54	Female	256.7	408	49	1.49	22.07	10.7789	174	89	5
117	72	Male	202.7	179	83	1.64	30.86	38.7127	156	85	3
118	67	Male	1630.3	151	76	1.73	25.39	45.1107	144	87	3
119	77	Male	579.5	199	64	1.62	24.39	24.8764	168	72	4
120	60	Male	107.9	186	69	1.75	22.5306	36.4373	172	91	3
121	64	Male	0	273	94	1.68	33.3	32.1291	106	69	3
122	62	Male	2873.1	119	65	1.61	25.08	52.3095	144	84	3
123	82	Female	927.5	114	53	1.41	26.66	28.1409	109	50	4
124	74	Male	1194.8	211	61	1.68	21.6128	23.4267	138	67	4
125	74	Female	327.2	140	56	1.41	28.17	27.5513	137	92	4
126	62	Male	219.3	181	72	1.65	26.45	38.095	140	70	3
127	63	Female	0	189	56	1.46	26.27	23.8098	176	79	4
128	67	Female	11.3	202	86	1.55	35.8	32.4346	147	76	3
129	59	Male	16.7	159	82	1.66	24.7	51.2887	150	80	3
130	71	Female	551.2	303	60	1.56	24.65	14.2592	182	75	5
131	71	Female	93.6	148	61	1.54	25.72	29.6795	158	75	4
132	65	Female	0	101	66	1.58	26.44	51.1473	148	69	3
133	71	Male	753	160	70	1.57	28.4	37.0635	161	80	3

## Sheet: Testing
NO	AGE	Gender	CTCA Calcium Score	Creatinine	Weight (kg)	Height (m)	BMI	eGFR	BPSystolic	BPDiastolic	CKD Stage
1	79	Male	1783	143	70	1.65	25.71	36.6616	180	92	3
2	60	Male	56.9	155	82	1.6	32.03	51.9627	133	80	3
3	35	Female	0	437	129	1.66	46.81	32.3472	176	92	3
4	51	Male	170.4	328	73	1.66	26.49	24.3197	157	73	4
5	60	Male	768.8	154	60	1.63	22.58	38.2684	103	59	3
6	79	Male	386.2	137	62	1.64	23.05	33.8938	121	65	3
7	71	Female	724.6	122	86	1.59	34.02	50.7606	141	77	3
8	53	Female	4.1	252	86	1.59	34.02	30.9853	157	71	3
9	49	Male	36	299	81	1.73	27.06	30.2674	152	81	3
10	62	Male	1482	213	72	1.64	26.77	32.3718	187	99	3
11	53	Male	53.6	160	62	1.55	25.81	41.3915	165	71	3
12	47	Male	153.6	418	71	1.59	28.08	19.3948	140	82	4
13	53	Male	0	187	86	1.78	27.14	49.1242	181	90	3
14	55	Female	406.1	109	68	1.55	28.3	65.106	153	76	2
15	43	Male	0.2	231	90	1.72	30.42	46.4004	159	100	3
16	72	Male	0	208	71	1.66	25.77	28.4986	150	80	4
17	63	Female	22.8	158	60	1.45	28.54	30.5157	174	83	3
18	58	Male	385.9	216	73	1.6	28.52	34.0254	191	111	3
19	57	Female	86.1	183	70	1.5	31.11	33.1332	155	83	3
20	62	Female	27.9	388	93	1.52	40.25	19.5112	158	68	4
21	57	Female	233.3	535	52	1.4	26.53	8.41911	164	80	5
22	66	Female	4.3	137	55	1.54	23.19	31.0036	115	68	3
23	70	Female	1882.8	118	60	1.59	23.73	37.1455	162	52	3
24	54	Female	0	191	67	1.51	29.38	31.4832	139	71	3
25	70	Female	490.1	196	71	1.53	30.33	26.463	186	84	3
26	56	Female	323.8	291	62	1.52	26.84	18.6774	143	80	4
27	65	Male	587.4	232	73	1.64	27.14	28.9745	194	95	4
28	68	Female	0	105	58	1.49	26.12	41.5059	153	94	3
29	42	Female	5.8	239	65	1.6	25.39	27.8151	181	104	3
30	60	Female	37	143	65	1.47	30.08	37.9495	117	83	3
31	55	Female	47.7	351	61	1.53	26.06	15.4163	138	78	4
32	60	Female	137.7	129	68	1.59	26.9	44.0096	165	94	3
33	69	Male	476.7	181	60	1.58	24.03	28.8969	104	60	4
34	50	Male	57.8	260	91	1.66	33.02	38.675	116	74	3
35	75	Female	1129.5	235	69	1.51	30.26	19.9174	110	56	4
36	48	Male	1039.9	242	97	1.63	36.51	45.2756	193	106	3
37	71	Male	1148.2	242	73	1.59	28.88	25.555	186	73	3
38	57	Male	386.1	337	73	1.81	22.28	22.0745	98	43	4
39	75	Male	0	325	74	1.65	27.18	18.1711	147	61	4
40	54	Female	317.6	381	65	1.46	30.49	15.3118	136	71	4
41	65	Female	36.2	190	102	1.57	41.38	42.0191	169	97	3
42	64	Male	156.9	253	65	1.67	23.31	23.9732	206	71	4
43	50	Male	15.1	847	89	1.76	28.73	11.611	168	83	5
44	71	Male	139.6	152	69	1.66	25.04	38.4569	134	56	3
45	60	Female	1742.3	160	92	1.53	39.3	48.0061	186	67	3
46	74	Female	74.9	234	64	1.47	29.62	18.8385	130	78	4
47	71	Male	593	188	68	1.67	24.38	30.6422	169	72	3
48	61	Male	94.3	219	102	1.72	34.48	45.1755	139	67	3
49	60	Male	121.8	183	81	1.78	25.56	43.4754	138	89	3
50	50	Female	113	258	67	1.53	28.62	24.3914	125	66	4
51	59	Male	691.7	283	72	1.67	25.82	25.3018	136	75	4
52	65	Male	1039.3	288	78	1.65	28.65	24.9392	123	70	4
53	45	Female	0	401	48	1.48	21.91	11.8675	150	96	5
54	56	Male	0	214	75	1.69	26.26	36.1449	92	100	3
55	51	Male	0	129	66	1.69	23.11	55.9067	144	86	3
56	73	Male	2207.1	191	57	1.58	22.83	24.5491	128	75	4
57	57	Male	169	155	80	1.68	28.34	52.5964	141	89	3
